# Supplementary material for: Integrating phenotype ontologies with PhenomeNET
Source: PubMed Central journal article supplement (PMC5735523; doi:10.1186/s13326-017-0167-4), 2017-12-19
Supplement: 13326_2017_167_MOESM1_ESM.pdf [file 13326_2017_167_MOESM1_ESM.pdf]

## Supplementary information: OAEI 2016 evaluation results for the phenotype track

| OM algorithm     | Track task | Mappings                |                              | Precision<br>Silver 2 | Recall<br>Silver 2 | F-Score<br>Silver 2 | Sum F-Scores<br>Silver 2 | Precision<br>Silver 3 | Recall<br>Silver 3 | F-Score<br>Silver 3 | Sum F-Scores<br>Silver 3 |
|------------------|------------|-------------------------|------------------------------|-----------------------|--------------------|---------------------|--------------------------|-----------------------|--------------------|---------------------|--------------------------|
|                  |            | Equivalent ( $\equiv$ ) | Subclasses ( $\sqsubseteq$ ) |                       |                    |                     |                          |                       |                    |                     |                          |
| AML              | HP-MP      | 1755                    | 0                            | 0.9305                | 0.7998             | 0.8602              | 1.7684                   | 0.8536                | 0.9446             | 0.8968              | 1.7714                   |
| AML              | DOID-ORDO  | 2098                    | 0                            | 0.8532                | 0.9708             | 0.9082              |                          | 0.7784                | 0.9981             | 0.8747              |                          |
| DiSMATCH         | HP-MP      | 644                     | 0                            | 0.5481                | 0.2058             | 0.2993              | 0.3818                   | 0.4550                | 0.1971             | 0.2750              | 0.3423                   |
| DiSMATCH         | DOID-ORDO  | 335                     | 0                            | 0.2269                | 0.0505             | 0.0825              |                          | 0.1910                | 0.0408             | 0.0673              |                          |
| FCA_Map          | HP-MP      | 1590                    | 0                            | 0.9836                | 0.7543             | 0.8539              | 1.8162                   | 0.9421                | 0.9244             | 0.9332              | 1.8706                   |
| FCA_Map          | DOID-ORDO  | 1803                    | 0                            | 0.9662                | 0.9586             | 0.9624              |                          | 0.8880                | 0.9926             | 0.9374              |                          |
| LogMap           | HP-MP      | 2011                    | 0                            | 0.9354                | 0.9125             | 0.9238              | 1.8372                   | 0.7732                | 0.9729             | 0.8617              | 1.728                    |
| LogMap           | DOID-ORDO  | 1667                    | 0                            | 0.9520                | 0.8779             | 0.9134              |                          | 0.9052                | 0.9375             | 0.9211              |                          |
| LogMapBio        | HP-MP      | 2151                    | 0                            | 0.9182                | 0.9315             | 0.9248              | 1.8338                   | 0.7545                | 0.9824             | 0.8535              | 1.7580                   |
| LogMapBio        | DOID-ORDO  | 1804                    | 0                            | 0.9202                | 0.8980             | 0.9090              |                          | 0.8642                | 0.9487             | 0.9045              |                          |
| LogMapLite       | HP-MP      | 667                     | 0                            | 1.0000                | 0.3449             | 0.5129              | 1.2284                   | 0.9985                | 0.4471             | 0.6176              | 1.3814                   |
| LogMapLite       | DOID-ORDO  | 1000                    | 0                            | 0.9930                | 0.5592             | 0.7155              |                          | 0.9890                | 0.6221             | 0.7638              |                          |
| LYAM             | HP-MP      | 381                     | 0                            | 0.4068                | 0.0685             | 0.1172              | 0.1172                   | 0.1654                | 0.0359             | 0.0590              | 0.0590                   |
| LYAM             | DOID-ORDO  | 0                       | 0                            | 0.0                   | 0.0                | 0.0                 |                          | 0.0                   | 0.0                | 0.0                 |                          |
| PhenomeNET-Full  | HP-MP      | 1582                    | 4144 (112.366)               | 0.7568                | 0.9164             | 0.8290              | 1.7149                   | 0.6292                | 0.9452             | 0.7555              | 1.6905                   |
| PhenomeNET-Full  | DOID-ORDO  | 1582                    | 4144 (112.366)               | 0.9498                | 0.8301             | 0.8859              |                          | 0.9472                | 0.9233             | 0.9351              |                          |
| PhenomeNET-Map   | HP-MP      | 1536                    | 3999 (107.268)               | 0.7708                | 0.9051             | 0.8326              | 0.8326                   | 0.6441                | 0.9389             | 0.7641              | 0.7641                   |
| PhenomeNET-Map   | DOID-ORDO  | 0                       | 0                            | 0                     | 0.0                | 0.0                 |                          | 0.0                   | 0.0                | 0.0                 |                          |
| PhenomeNET-Plain | HP-MP      | 745                     | 2.707 (96.278)               | 0.7828                | 0.5784             | 0.6653              | 0.6653                   | 0.6391                | 0.5076             | 0.5658              | 0.5658                   |
| PhenomeNET-Plain | DOID-ORDO  | 0                       | 0                            | 0.0                   | 0.0                | 0.0                 |                          | 0.0                   | 0.0                | 0.0                 |                          |
| XMap             | HP-MP      | 650                     | 0                            | 1.0000                | 0.3332             | 0.4998              | 1.12213                  | 1.0000                | 0.4351             | 0.6064              | 1.3739                   |
| XMap             | DOID-ORDO  | 1030                    | 0                            | 0.9845                | 0.5693             | 0.7214              |                          | 0.9767                | 0.6320             | 0.7674              |                          |

Table 1: Precision, Recall, F-measure obtained against the silver standard with vote 2 and 3

| OM algorithm     | HP-MP  | DOID-ORDO |
|------------------|--------|-----------|
| PhenomeNET-Full  | 0.8966 | 0.0000    |
| PhenomeNET-Map   | 0.8966 | 0.0000    |
| PhenomeNET-Plain | 0.8276 | 0.0000    |
| AML              | 0.7586 | 0.0000    |
| LogMapBio        | 0.6897 | 0.1667    |
| LogMap           | 0.6552 | 0.1167    |
| FCA-Map          | 0.6207 | 0.0000    |
| LogMapLite       | 0.5172 | 0.0000    |
| XMap             | 0.5172 | 0.0000    |
| DiSMATCH         | 0.1379 | 0.0333    |
| LYAM             | 0.0000 | 0.0000    |

Table 2: Precision for manually created mappings

| OM algorithm     | Track task | Unique Equivalence Mappings | Precision (manual assessment) | Positive contribution (true positives) | Negative contribution (false positives) |
|------------------|------------|-----------------------------|-------------------------------|----------------------------------------|-----------------------------------------|
| AML              | HP-MP      | 122                         | 0.8667                        | 8.63%                                  | 1.33%                                   |
| DiSMatch         | HP-MP      | 291                         | 0.8333                        | 19.80%                                 | 3.96%                                   |
| FCA_Map          | HP-MP      | 26                          | 0.9615                        | 2.04%                                  | 0.08%                                   |
| LogMap           | HP-MP      | 130                         | 0.9330                        | 9.90%                                  | 0.71%                                   |
| LogMapLite       | HP-MP      | 0                           | 0.0                           | 0.0%                                   | 0.0%                                    |
| LogMapBio        | HP-MP      | 176                         | 0.9330                        | 13.40%                                 | 0.96%                                   |
| LYAM++           | HP-MP      | 226                         | 0.7000                        | 12.91%                                 | 5.53%                                   |
| PhenomeNET-Full  | HP-MP      | 89                          | 1.0000                        | 7.27%                                  | 0.0%                                    |
| PhenomeNET-Map   | HP-MP      | 85                          | 1.0000                        | 6.94%                                  | 0.00%                                   |
| PhenomeNET-Plain | HP-MP      | 80                          | 1.0000                        | 6.53%                                  | 0.00%                                   |
| XMAP             | HP-MP      | 0                           | 0.0000                        | 0.00%                                  | 0.00%                                   |
| <b>Totals</b>    | HP-MP      | <b>1225</b>                 |                               | <b>87.42%</b>                          | <b>12.58%</b>                           |

Table 3: Evaluation of unique mappings (HP-MP task)

| OM algorithm     | Track task | Unique Equivalence Mappings | Precision (manual assessment) | Positive contribution (true positives) | Negative contribution (false positives) |
|------------------|------------|-----------------------------|-------------------------------|----------------------------------------|-----------------------------------------|
| AML              | DOID-ORDO  | 308                         | 0.8667                        | 30.40%                                 | 4.68%                                   |
| DisMatch         | DOID-ORDO  | 259                         | 0.4000                        | 11.80%                                 | 17.70%                                  |
| FCA_Map          | DOID-ORDO  | 61                          | 0.8330                        | 5.79%                                  | 1.16%                                   |
| LogMap           | DOID-ORDO  | 80                          | 0.9000                        | 8.20%                                  | 0.91%                                   |
| LogMapLite       | DOID-ORDO  | 7                           | 0.5000                        | 0.40%                                  | 0.40%                                   |
| LogMapBio        | DOID-ORDO  | 144                         | 0.9667                        | 15.85%                                 | 0.55%                                   |
| LYAM++           | DOID-ORDO  | 0                           | 0.0000                        | 0.00%                                  | 0.00%                                   |
| PhenomeNET-Full  | DOID-ORDO  | 3                           | 1.0000                        | 0.34%                                  | 0.00%                                   |
| PhenomeNET-Map   | DOID-ORDO  | 0                           | 0.0000                        | 0.00%                                  | 0.00%                                   |
| PhenomeNET-Plain | DOID-ORDO  | 0                           | 0.0000                        | 0.00%                                  | 0.00%                                   |
| XMap             | DOID-ORDO  | 16                          | 0.5625                        | 1.03%                                  | 0.80                                    |
| <b>Totals</b>    | HP-MP      | <b>878</b>                  |                               | <b>73.81%</b>                          | <b>26.19%</b>                           |

Table 4: Evaluation of unique mappings (DOID-ORDO task)
